# Supplementary material for: Carboxymethyl Chitosan Microgels for Sustained Delivery of Vancomycin and Long-Lasting Antibacterial Effects
Source: MDPI journal article supplement (doi:10.3390/gels9090708), 2023-09-01
Supplement: s1 [file s1]

# Carboxymethyl chitosan microgels for sustained delivery of Vancomycin and long-lasting antibacterial effects

Mehtap Sahiner <sup>1,2</sup>, Aynur S. Yilmaz <sup>2,3</sup>, Ramesh S. Ayyala <sup>4</sup> and Nurettin Sahiner <sup>2,3,4,\*</sup>

<sup>1</sup> Department of Bioengineering, Faculty of Engineering, Canakkale, Onsekiz Mart University Terzioğlu Campus, Canakkale, 17100, TURKEY; sahinerm78@gmail.com (M. Sahiner)

<sup>2</sup> Department of Chemical, Biological and Materials Engineering, University of South Florida, Tampa, FL 33620, USA; sahinerm78@gmail.com (M. Sahiner); sanemyilmazz99@gmail.com (A.S. Yilmaz); sahinerm71@gmail.com (N. Sahiner)

<sup>3</sup> Department of Chemistry, Faculty of Sciences, and Nanoscience and Technology Research and Application Center (NANORAC), Canakkale Onsekiz Mart University Terzioğlu Campus, Canakkale, 17100, TURKEY; sahinerm78@gmail.com (M. Sahiner); sanemyilmazz99@gmail.com (A.S. Yilmaz); sahinerm71@gmail.com (N. Sahiner)

<sup>4</sup> Department of Ophthalmology, Morsani College of Medicine, University of South Florida Eye Institute, 12901 Bruce B Down Blvd, MDC 21, Tampa, FL 33612, USA; rsayyala@gmail.com (R.S. Ayyala); sahinerm71@gmail.com (N. Sahiner)

\* Correspondence: sahinerm71@gmail.com; nsahiner@usf.edu

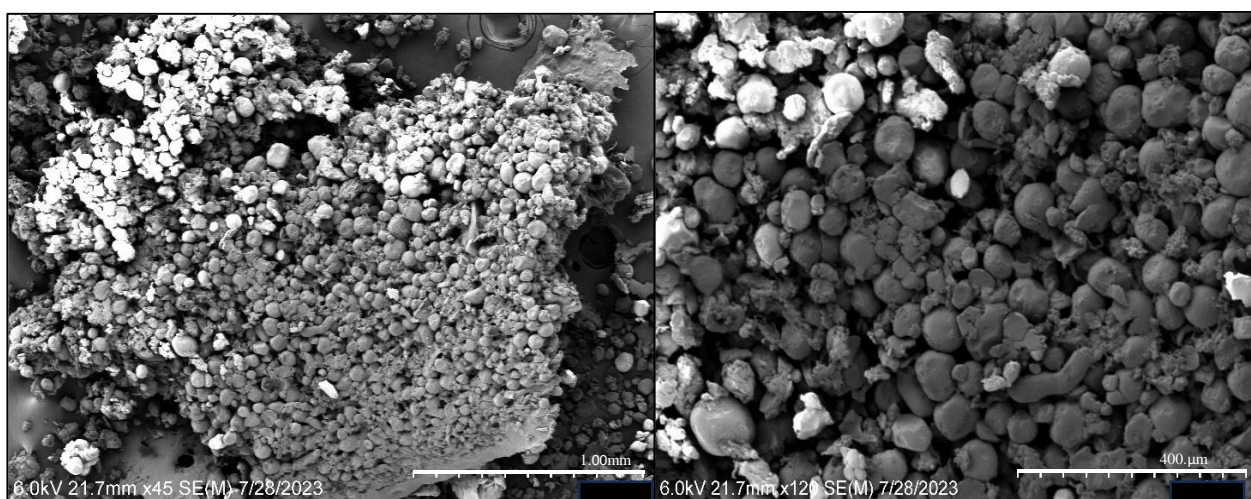

**Figure S1.** SEM images of Van@p(CMCh) microgels at different magnifications.

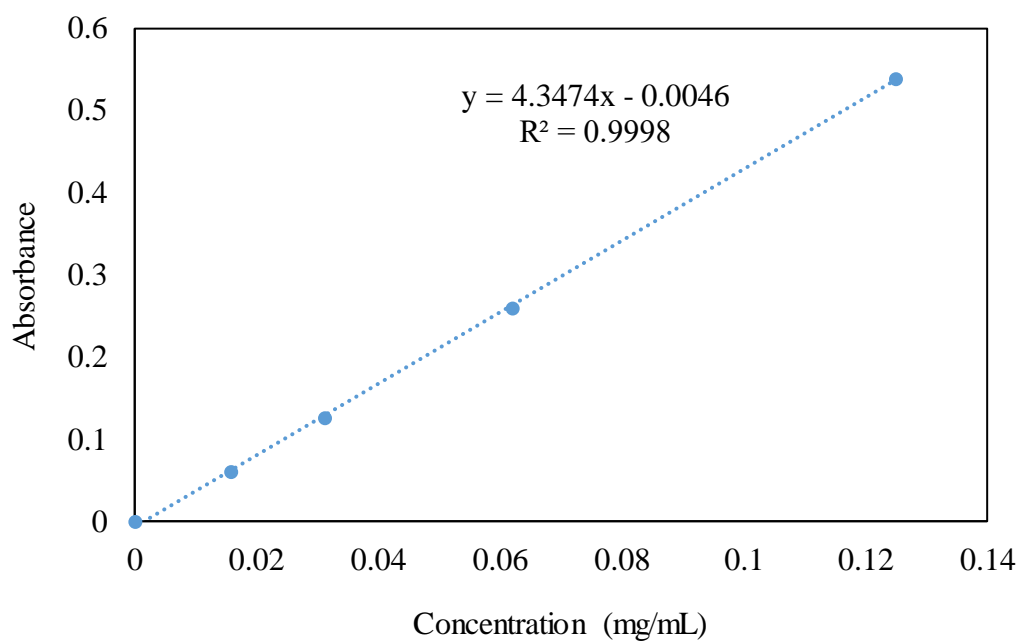

**Figure S2.** The Calibration curve of Vancomycin (Van) in phosphate-buffered saline solution at 280 nm.

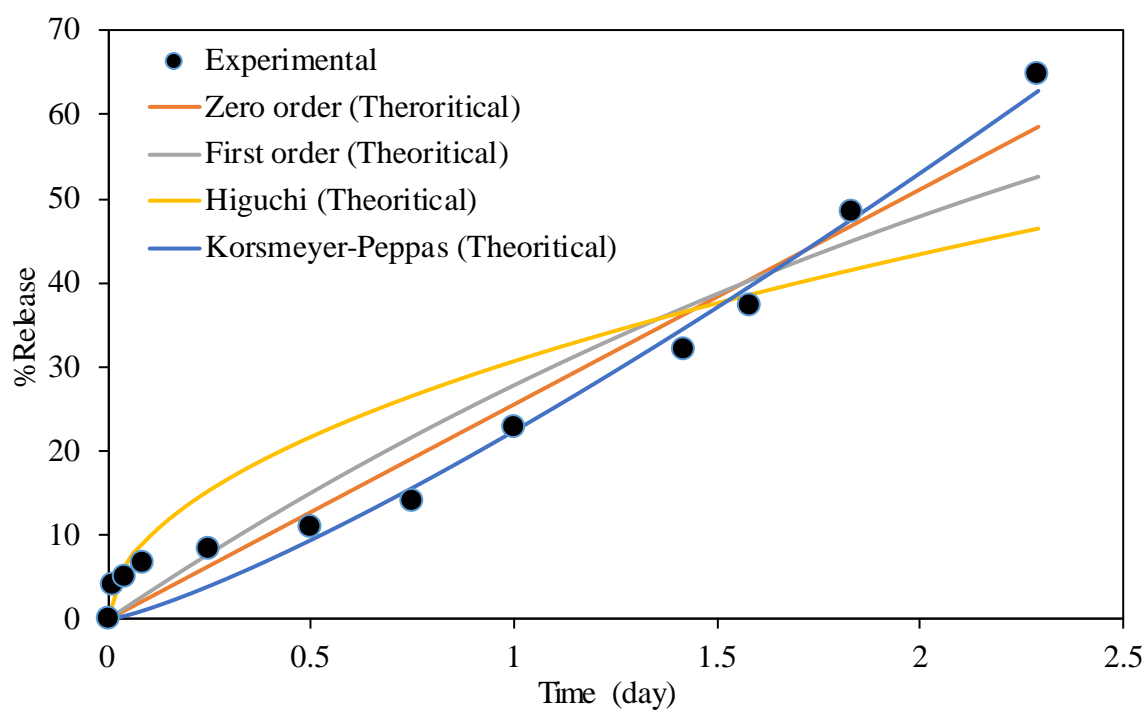

**Figure S3.** The Van release% from Van@CMCh microgels vs time plots for related kinetic models.

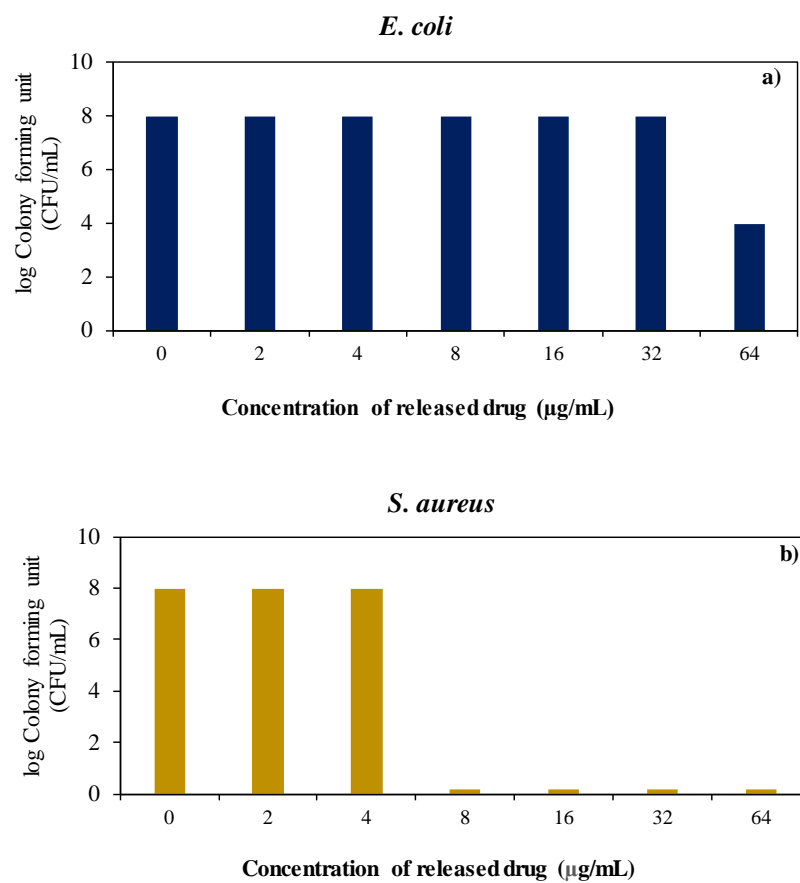

**Figure S4.** Colony forming units (CFU/mL) of (a) *E. coli* and (b) *S. aureus* strains versus the concentration of the released amount of Van from Van@CMCh microgels at 24h incubation time.
